# Supplementary material for: Optimisation of an Aglycone-Enhanced Celery Extract with Germinated Soy Supplementation Using Response Surface Methodology
Source: MDPI journal article supplement (doi:10.3390/foods10102505), 2021-10-19
Supplement: s1 [file s1]

**Table S1.** MS parameters of celery and soy compounds

| Analyte   | MW  | tR<br>(min) | Ionisation<br>mode | Q1<br>(m/z) | Q3<br>(m/z) | DP<br>(V) | CE<br>(eV) | CXP<br>(V) | Linear equation       | Linearity range<br>(ng/mL) | R <sup>2</sup> | LOD<br>(ng/mL) | LOQ<br>(ng/mL) |
|-----------|-----|-------------|--------------------|-------------|-------------|-----------|------------|------------|-----------------------|----------------------------|----------------|----------------|----------------|
| Daidzin   | 416 | 3.96        | +                  | 417         | 255         | 60        | 30         | 14         | $y = 49734x + 6568$   | 2.5 - 50                   | 1.000          | 1.17           | 3.53           |
| Genistin  | 432 | 4.22        | +                  | 433         | 271         | 50        | 23         | 15         | $y = 235068x - 13821$ | 0.5 - 10                   | 1.000          | 0.32           | 0.96           |
| Apiin     | 564 | 4.56        | +                  | 565         | 271         | 40        | 32         | 15         | $y = 73452x - 86991$  | 2.5 - 100                  | 1.000          | 1.77           | 5.36           |
| Apigetrin | 432 | 4.65        | +                  | 433         | 271         | 50        | 25         | 15         | $y = 112017x - 35644$ | 2.5 - 50                   | 1.000          | 1.52           | 4.62           |
| Daidzein  | 254 | 5.1         | +                  | 255         | 199         | 100       | 34         | 10         | $y = 179372x + 89405$ | 0.5 - 25                   | 0.997          | 0.21           | 0.63           |
| Genistein | 270 | 5.56        | -                  | 269         | 133         | 140       | 38         | 7          | $y = 17718x - 14517$  | 2.5 - 50                   | 1.000          | 1.57           | 4.75           |
| Apigenin  | 270 | 5.93        | -                  | 269         | 117         | 100       | 45         | 6          | $y = 46649x - 32157$  | 1 - 50                     | 0.998          | 0.43           | 1.28           |
